# Supplementary material for: Rectangular copper nanotubes
Source: Royal Society of Chemistry journal article supplement (doi:10.1039/c5ra17462g), 2015-01-01
Supplement: c5ra17462g1.pdf [file c5ra17462g1.pdf]

Supporting Information

**Rectangular Copper Nanotubes**

Yu-Hsu Chang,<sup>1\*</sup> Ya-Ting Hsu,<sup>1</sup> Yu-Heng Tsai,<sup>1</sup> Yi-Ru Lai,<sup>1</sup> Ting-Kai Huang<sup>2</sup> and  
Hsin-Tien Chiu<sup>2</sup>

<sup>1</sup> Department of Materials and Mineral Resources Engineering, Institute of Mineral  
Resources Engineering, National Taipei University of Technology, Taipei 10608,  
Taiwan

<sup>2</sup> Department of Applied Chemistry, National Chiao Tung University, Hsinchu 300,  
Taiwan

Corresponding author (Y.-H. Chang): 1, Sec. 3, Zhongxiao E. Rd., Taipei 10608,  
Taiwan, R.O.C. Tel.: +886-2-27712171#2769; Fax: +886-2-27317185; E-mail:  
[yhchang@ntut.edu.tw](mailto:yhchang@ntut.edu.tw)

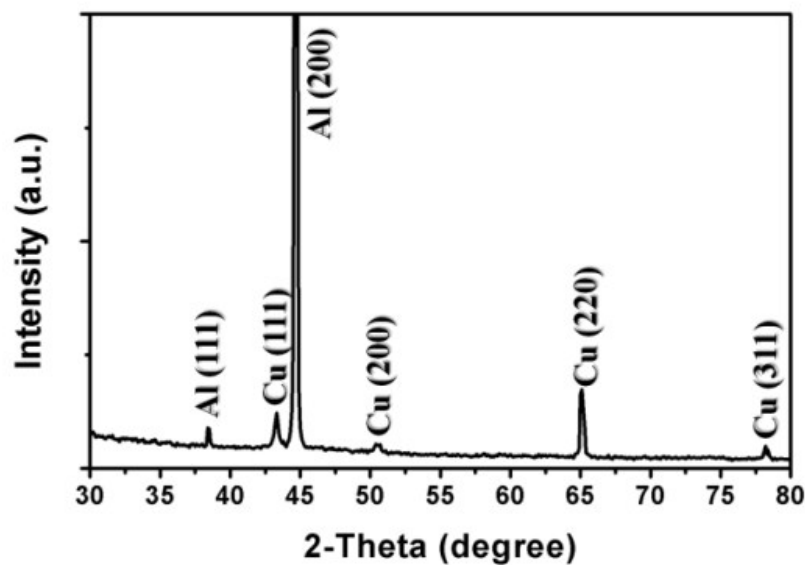

**Figure S1.** XRD pattern of rectangular copper NTs.

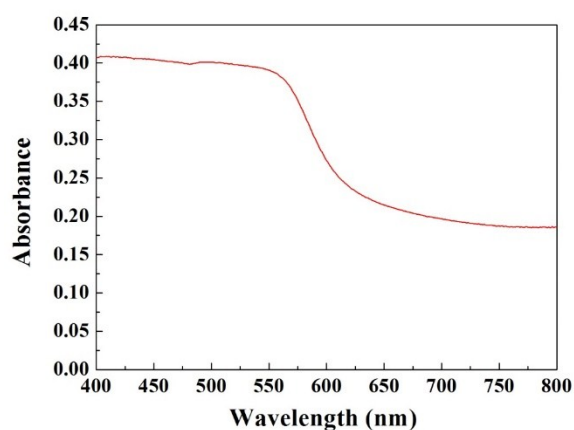

**Figure S2.** An UV–Vis absorption spectrum of rectangular copper NTs prepared at 21°C has absorption at 560 nm due to surface plasmon resonance. The absorption bands for 1D copper nanomaterials have been reported to be in the range of 550–600 nm (ref. *J. Chem. Phys.*, 2005, **123**, 094710; *Cryst. Growth Des.*, 2008, **8**, 3415; *Sci. Rep.*, 2013, **3**, 2323; *Mater. Lett.*, 2007, **61**, 4711). By the present synthetic method, we have been able to prepare rectangular copper NTs with surface plasmon resonance property.

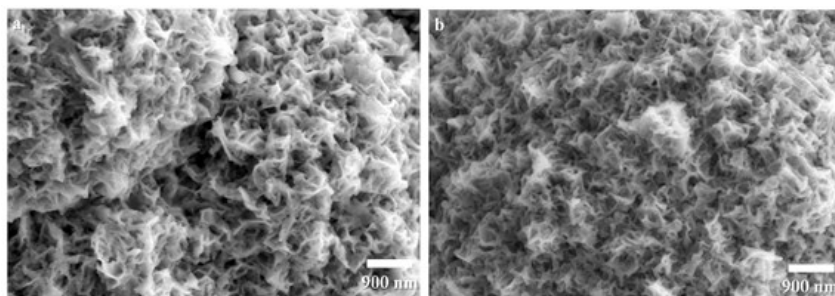

**Figure S3.** SEM images of Cu materials synthesized at 17°C with different amount of HNO<sub>3</sub>: (a) 22  $\mu$ L; (b) 30  $\mu$ L. The concentration of CuCl<sub>2</sub> and CTAC is 5 mM and 1.5 mM, respectively.

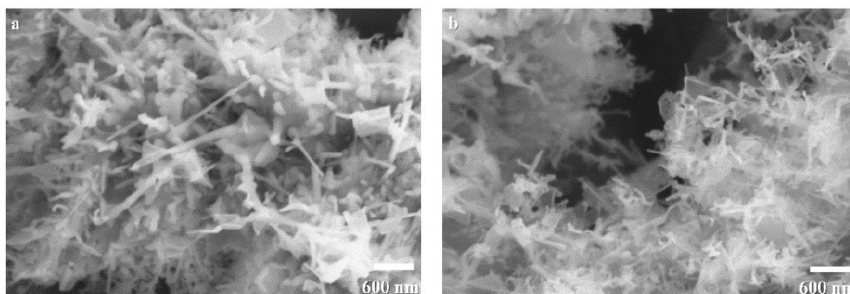

**Figure S4.** SEM images of Cu materials synthesized at 17°C with different amount of HNO<sub>3</sub>: (a) 22  $\mu$ L; (b) 30  $\mu$ L. The concentration of CuCl<sub>2</sub> and CTAC is 5 mM and 2 mM, respectively.

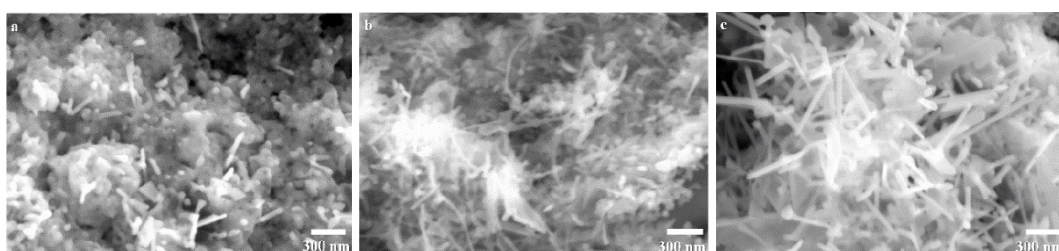

**Figure S5.** SEM images of Cu materials synthesized with 22  $\mu$ L of HNO<sub>3</sub> at 17°C for different reaction time: (a) 3h; (b) 6h; (c) 10h. The concentration of CuCl<sub>2</sub> and CTAC is 5 mM and 1.8 mM, respectively.

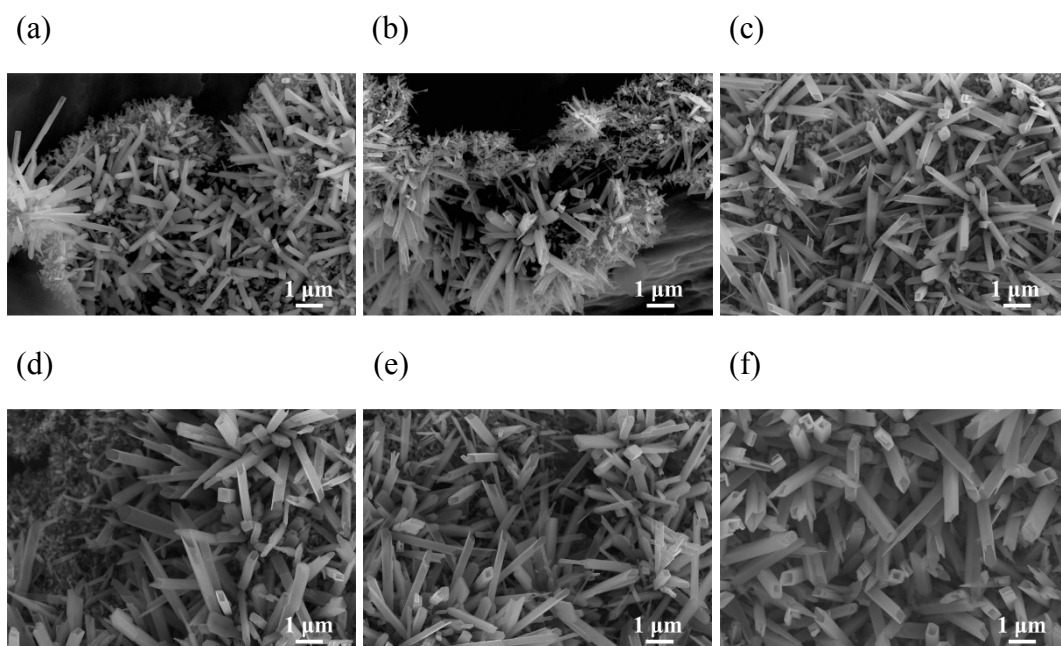

**Figure S6.** SEM images of rectangular copper NTs synthesized with 22  $\mu\text{L}$  of  $\text{HNO}_3$  at 21°C for different reaction time: (a) 3h; (b) 6h; (c) 9h; (d) 12h; (e) 15h; (f) 20h. The concentration of  $\text{CuCl}_2$  and CTAC is 5 mM and 1.8 mM, respectively.

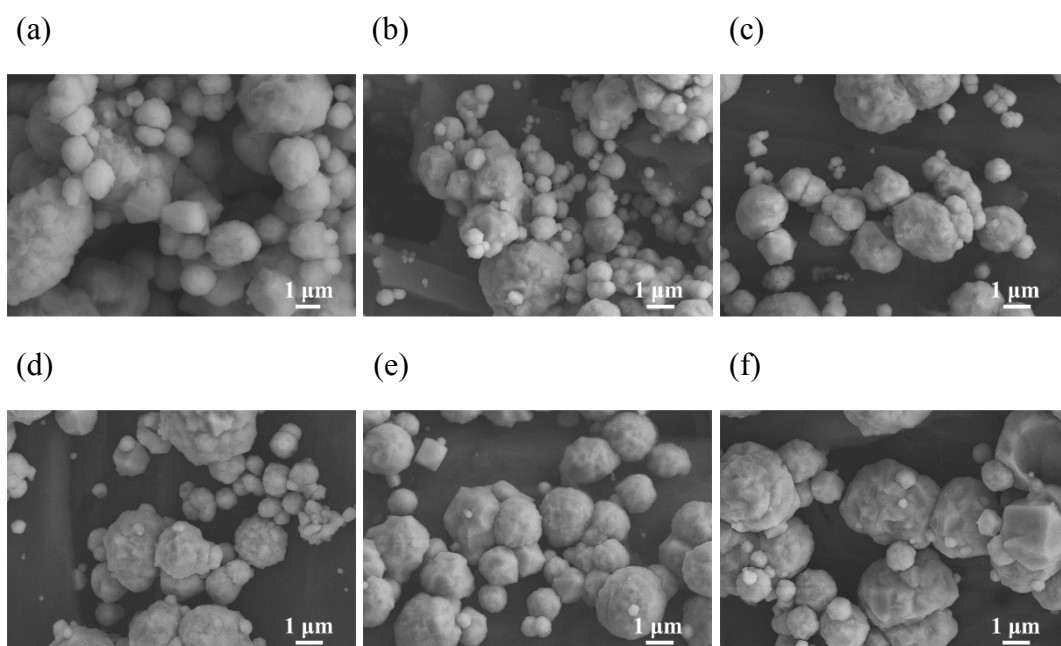

**Figure S7.** SEM images of Cu materials synthesized at 21°C for 20h with different concentration of PVP (polyvinylpyrrolidone) as the surfactant: (a) 0.1 mM; (b) 0.5 mM; (c) 1.0 mM; (d) 1.5 mM; (e) 2.0 mM; (f) 3.0 mM. The concentration of  $\text{CuCl}_2$  is 5 mM and the amount of  $\text{HNO}_3$  is 22  $\mu\text{L}$ .

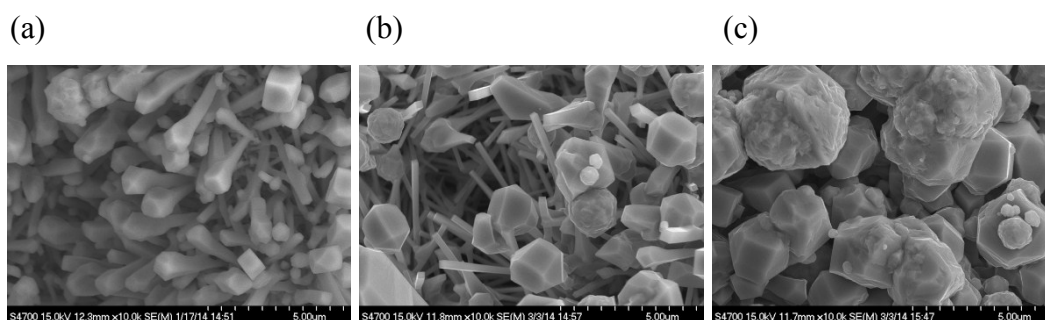

**Figure S8.** SEM images of Cu materials grown again at 21°C for 20h: (a) 5 mM  $\text{CuCl}_2$ /2 mM PVP; (b) 3.5 mM  $\text{CuCl}_2$ /0.3 mM PVP; (c) 3.5 mM  $\text{CuCl}_2$ /0.5 mM PVP. The amount of  $\text{HNO}_3$  is 22  $\mu\text{L}$ . PVP is a capping agent commonly used in preparation of nanoparticles.
